# Supplementary material for: The hydrothermal synthesis, crystal structure and electrochemical properties of MnSb2O4
Source: Royal Society of Chemistry journal article supplement (doi:10.1039/c6dt03459d), 2016-01-01
Supplement: c6dt03459d1.pdf [file c6dt03459d1.pdf]

# Supporting information

## The hydrothermal synthesis, crystal structure and electrochemical properties of MnSb<sub>2</sub>O<sub>4</sub>

Martin Roelsgaard, Peter Nørby, Espen Eikeland, Martin Søndergaard and Bo Brummerstedt Iversen\*

Center for Materials Crystallography, Department of Chemistry and iNANO, Aarhus University, DK-8000 Aarhus C, Denmark

### 1. High resolution PXRD

Low temperature patterns were collected at 105, 150, 200, 250, 300 and 350 K. High temperature was collected at HT1: 300, 380, 420, 460, 520, 560, 620, 660 K and HT2: 300, 380, 420, 560, 660, 760 and 850 K. The wavelength was calibrated with a NIST CeO<sub>2</sub> standard. The wavelength was 0.500345(2) Å, 0.500256(2) Å and 0.500176(2) Å during three different beamtimes.

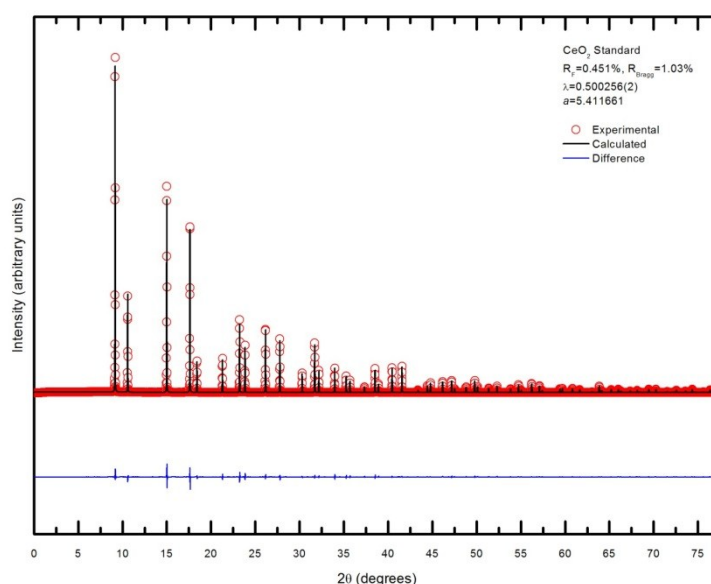

Figure S.1: Wavelength calibrations at the BL44B2 beamline using CeO<sub>2</sub>.

In figure S.2 the cell axes for three measurements of two samples of MnSb<sub>2</sub>O<sub>4</sub>. The left and middle part shows the same trend is reproduced when re-measured. The right part shows a different sample reproducing the same trend, but to a different degree. Reliability factors and atomic displacement parameters from the Rietveld refinements are given in table S.1 and S.2.

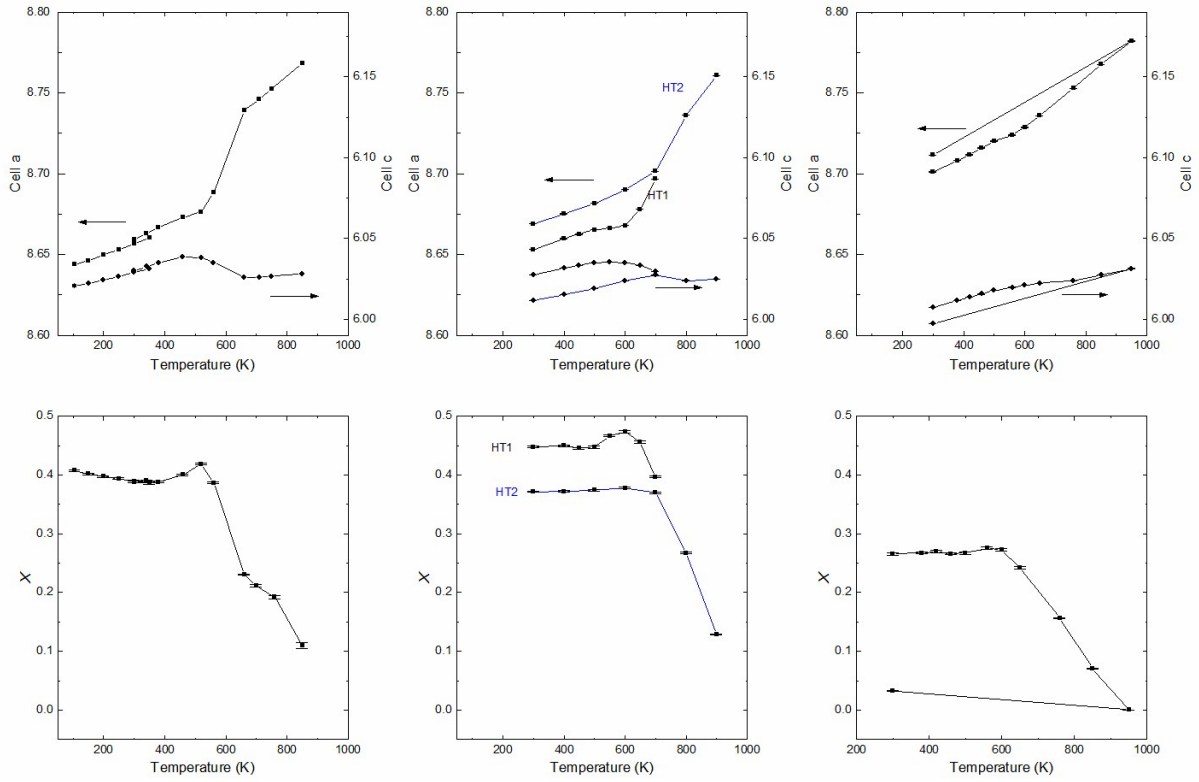

**Figure S.2:** Cell axes and X peak profile parameter for three samples measured. Left: 105-350 K (glass), 300-850 K (quartz). Middle: 300-660 K (HT1) and 300-850 K (HT2). Right: 300-950 K and 300 K.

**Table S.1:** Reliability factors from 105 – 850 K

| T (K)      | $R_p$ | $R_{wp}$ | $R_{exp}$ | $\chi^2$ | $R_B$ | $R_F$ |
|------------|-------|----------|-----------|----------|-------|-------|
| <b>LT</b>  |       |          |           |          |       |       |
| 105        | 10.1  | 10.8     | 4.2       | 6.597    | 3.38  | 2.41  |
| 150        | 10.2  | 10.9     | 4.21      | 6.66     | 3.29  | 2.48  |
| 200        | 10.5  | 11.1     | 4.26      | 6.805    | 3.4   | 2.53  |
| 250        | 10.6  | 11.3     | 4.29      | 6.882    | 3.25  | 2.71  |
| 300        | 10.9  | 11.4     | 4.33      | 6.909    | 3.25  | 3.04  |
| 350        | 10.9  | 11.3     | 4.37      | 6.706    | 3.36  | 3.12  |
| <b>HT1</b> |       |          |           |          |       |       |
| 300        | 11.4  | 10.4     | 10.1      | 1069     | 4.43  | 3.41  |
| 380        | 11.4  | 10.3     | 10.2      | 1008     | 3.85  | 3.81  |
| 420        | 11.6  | 10.2     | 10.2      | 1000     | 3.86  | 3.7   |
| 460        | 11.6  | 10.3     | 10.4      | 0.9795   | 4.43  | 4.25  |
| 520        | 11.6  | 10.1     | 10.4      | 0.9434   | 5.67  | 4.51  |
| 560        | 12.2  | 10.7     | 10.4      | 1064     | 8.37  | 5.48  |
| 620        | 12.6  | 11.3     | 10.3      | 1213     | 18.2  | 5.6   |
| 660        | 11.2  | 10.1     | 10        | 1003     | 4.72  | 5.86  |
| <b>HT2</b> |       |          |           |          |       |       |
| 300        | 10.2  | 9.88     | 9.04      | 1194     | 3.61  | 3.18  |
| 380        | 10.3  | 9.81     | 9.14      | 1154     | 3.57  | 3.65  |
| 460        | 10.6  | 9.83     | 9.24      | 1132     | 3.61  | 3.75  |
| 560        | 10.7  | 9.83     | 9.46      | 1081     | 3.77  | 5.02  |
| 660        | 10.6  | 9.45     | 9.59      | 0.971    | 3.7   | 5.8   |
| 760        | 9.23  | 8.36     | 8.16      | 1050     | 2.51  | 6.85  |
| 850        | 11.5  | 10.1     | 8.24      | 1.502    | 2.64  | 12.2  |

**Table S.2:** Atomic displacement parameters for MnSb<sub>2</sub>O<sub>4</sub> (LT, HT1 and HT2).

| Temperature (K) | U <sub>eq</sub> (Mn) (Å <sup>2</sup> ) | U <sub>eq</sub> (Sb) (Å <sup>2</sup> ) | U <sub>eq</sub> (O1) (Å <sup>2</sup> ) | U <sub>eq</sub> (O2) (Å <sup>2</sup> ) |
|-----------------|----------------------------------------|----------------------------------------|----------------------------------------|----------------------------------------|
| <b>LT</b>       |                                        |                                        |                                        |                                        |
| 105             | 0.003(4)                               | 0.0118(7)                              | 0.008(2)                               | 0.007(2)                               |
| 150             | 0.0012(4)                              | 0.0130(7)                              | 0.009(2)                               | 0.008(2)                               |
| 200             | 0.0020(5)                              | 0.0145(8)                              | 0.010(2)                               | 0.007(2)                               |
| 250             | 0.0032(5)                              | 0.0160(8)                              | 0.011(2)                               | 0.008(2)                               |
| 300             | 0.0043(5)                              | 0.0177(8)                              | 0.014(2)                               | 0.011(2)                               |
| 350             | 0.0050(5)                              | 0.0195(9)                              | 0.015(2)                               | 0.012(2)                               |
| <b>HT1</b>      |                                        |                                        |                                        |                                        |
| 300             | 0.0036(5)                              | 0.0191(9)                              | 0.014(2)                               | 0.014(2)                               |
| 400             | 0.0050(5)                              | 0.0216(9)                              | 0.018(2)                               | 0.019(2)                               |
| 450             | 0.0058(5)                              | 0.0229(9)                              | 0.014(2)                               | 0.019(2)                               |
| 500             | 0.0064(5)                              | 0.024(1)                               | 0.018(2)                               | 0.021(3)                               |
| 550             | 0.0076(6)                              | 0.026(1)                               | 0.018(2)                               | 0.022(3)                               |
| 600             | 0.0090(6)                              | 0.028(1)                               | 0.020(2)                               | 0.025(3)                               |
| 650             | 0.0115(6)                              | 0.028(1)                               | 0.019(2)                               | 0.027(3)                               |
| 700             | 0.0137(6)                              | 0.0273(9)                              | 0.021(2)                               | 0.030(3)                               |
| <b>HT2</b>      |                                        |                                        |                                        |                                        |
| 300             | 0.0049(4)                              | 0.0147(7)                              | 0.011(2)                               | 0.009(2)                               |
| 400             | 0.0067(5)                              | 0.0173(7)                              | 0.013(2)                               | 0.011(2)                               |
| 500             | 0.0090(5)                              | 0.0204(8)                              | 0.016(2)                               | 0.015(2)                               |
| 600             | 0.0114(5)                              | 0.0232(8)                              | 0.019(2)                               | 0.018(2)                               |
| 700             | 0.0137(5)                              | 0.0261(8)                              | 0.024(2)                               | 0.024(2)                               |
| 800             | 0.0210(4)                              | 0.0278(6)                              | 0.027(1)                               | 0.029(2)                               |
| 900             | 0.0263(5)                              | 0.0315(6)                              | 0.033(2)                               | 0.037(2)                               |

## 2. Evolution of cell parameters from SCXRD

The cell parameters of a MnSb<sub>2</sub>O<sub>4</sub> crystal is plotted against temperature in Figure S.3. The data was acquired in one series from 100-475 K and subsequently from 475-100 K, and normalized to the first temperature at 300 K. Fluctuations in the cell parameters are either due to a systematic error in the setup or changes to the sample (decomposition/gas uptake). All measured diffraction data have been measured using the same experimental setup (SuperNova diffractometer), with the same measuring strategy and the same orientation of the crystal.

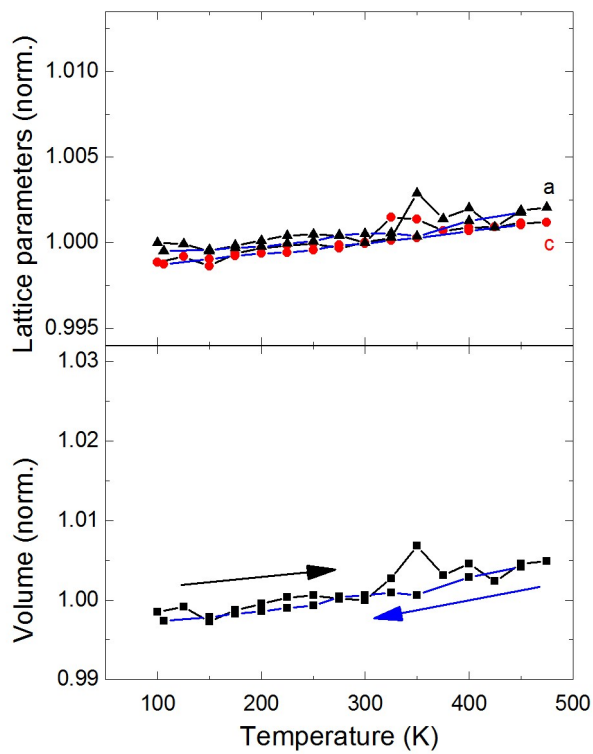

**Figure S.3:** Normalized cell parameters for  $\text{MnSb}_2\text{O}_4$  as function of temperature. Diffraction data have been measured from 100 K up to 475 K (black lines) and then also upon cooling the sample down to 100 K (blue lines).

### 3. Thermogravimetry

Figure S.4 shows PXRD obtained of  $\text{MnSb}_2\text{O}_4$  that was heated up to 1000 K with oxygen present and three standard PXRD patterns to describe all reflections.

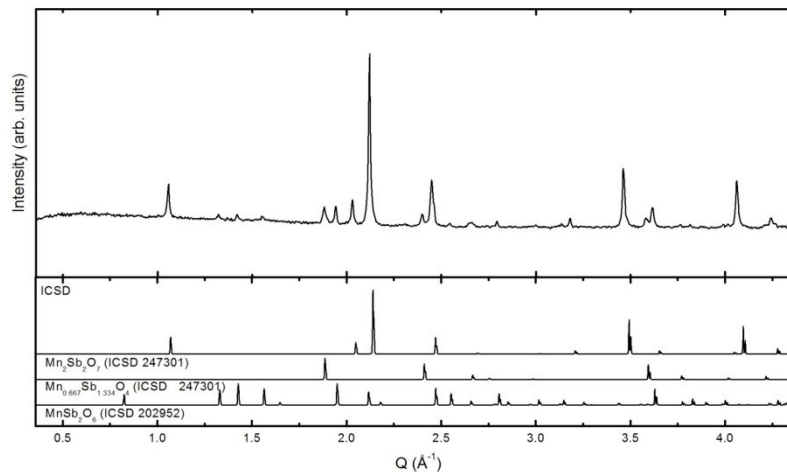

**Figure S.4:** PXRD of  $\text{MnSb}_2\text{O}_4$  after being heated to 1000 K with oxygen present and simulated patterns from ICSD. Oxidation has occurred with a mass increase of 8%.

#### 4. FTIR

Figure S.5 shows FTIR of the as-synthesised  $\text{MnSb}_2\text{O}_4$  particles and particles that were washed with deionised water.

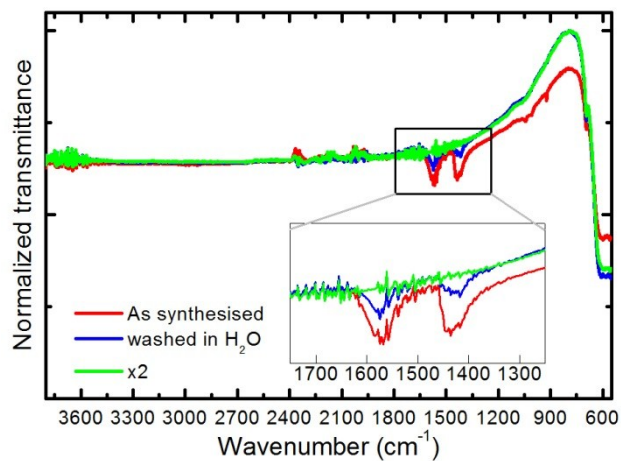

Figure S.5: FTIR of  $\text{MnSb}_2\text{O}_4$  before/after wash/decant procedure.

#### 5. Na-ion half-cell electrochemical performance

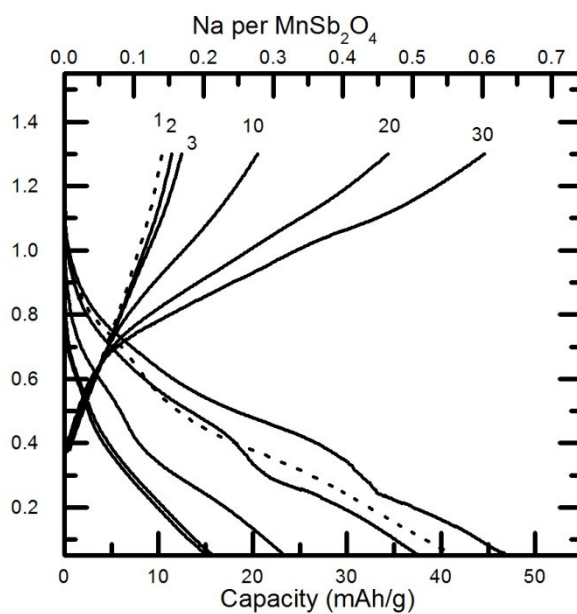

Figure S.6: Potential (vs.  $\text{Na}/\text{Na}^+$ ) vs. capacity for  $\text{MnSb}_2\text{O}_4$  under galvanostatic charge/discharge at 30  $\text{mA/g}$  between 0.05-1.3 V.
